# Supplementary material
Source: publisher figshare collection journal article supplement (https://frontiersin.figshare.com/ndownloader/files/14136221)
Supplement: Supplementary file [file 14136221]

**Table S1 – Summary of 43 reported patients with bullous Henoch-Schoenlein Purpura**

| No. | Age | Sex | Localization of bullous lesions | Size of lesions | Organ involvement |         |       | Biopsy: IgA-deposition | Medical Treatment                          | Re-occurrence of lesions        | Skin sequelae | Documented Follow-up | Reference                  |
|-----|-----|-----|---------------------------------|-----------------|-------------------|---------|-------|------------------------|--------------------------------------------|---------------------------------|---------------|----------------------|----------------------------|
|     |     |     |                                 |                 | Joints            | Abdomen | Renal |                        |                                            |                                 |               |                      |                            |
| 1   | 5   | m   | legs, arms                      | unknown         | yes               | yes     | yes   | not performed          | no treatment                               | no                              | unknown       | unknown              | Garland <i>et al</i>       |
| 2   | 7   | f   | legs                            | unknown         | yes               | no      | no    | not performed          | no treatment                               | no                              | unknown       | unknown              | Bari <i>et al</i>          |
| 3   | 5   | m   | pinnae, gum, hands, legs        | 2-50 mm         | yes               | yes     | yes   | no                     | PS                                         | no                              | none          | unknown              | Wananukul <i>et al</i>     |
| 4   | 10  | m   | legs                            | not reported    | yes               | yes     | no    | no                     | no treatment                               | no                              | unknown       | 12 months            | Kobayashi <i>et al</i>     |
| 5   | 7   | f   | feet, ankles                    | not reported    | yes               | yes     | no    | yes                    | PS                                         | no                              | none          | 12 months            | Saulsbury <i>et al</i>     |
| 6   | 3   | f   | legs, feet                      | 5-20 mm         | yes               | yes     | yes   | not performed          | PS, started 10 days before onset of bullae | no                              | none          | 6 months             |                            |
| 7   | 7   | f   | legs                            | unknown         | yes               | no      | no    | no                     | HC                                         | no                              | none          | unknown              | Liu <i>et al</i>           |
| 8   | 6   | m   | legs                            | unknown         | yes               | yes     | no    | no                     | HC                                         | no                              | pigmentation  | unknown              |                            |
| 9   | 4   | m   | face, hands, buttocks, legs     | 5-20mm          | yes               | yes     | no    | yes                    | PS, MPS                                    | no                              | unknown       | 3 months             | Ishii <i>et al</i>         |
| 10  | 8   | m   | ankles, feet                    | - 35 mm         | yes               | yes     | no    | not performed          | no treatment                               | no                              | none          | 6 months             | Leung <i>et al</i>         |
| 11  | 14  | m   | feet                            | not reported    | no                | yes     | no    | no                     | naproxen, colchicine                       | Similar lesions 2 years earlier | none          | 3 months             | Chan <i>et al</i>          |
| 12  | 4   | f   | legs                            | not reported    | yes               | no      | no    | not performed          | no treatment                               | no                              | none          | 3 months             | Aydinoz <i>et al</i>       |
| 13  | 10  | m   | hands, legs, feet               | not reported    | yes               | yes     | yes   | yes                    | PS                                         | no                              | unknown       | 3 months             | Abdul-Ghaffer <i>et al</i> |
| 14  | 9   | f   | Arms, legs, feet                | 3-20 mm         | no                | yes     | no    | yes                    | PS                                         | no                              | scarring      | 12 months            | Junior <i>et al</i>        |
| 15  | 9   | f   | feet                            | 5-10 mm         | yes               | no      | yes   | not performed          | PS                                         | no                              | none          | 14 months            |                            |
| 16  | 6   | f   | feet                            | 10-15 mm        | yes               | no      | no    | yes                    | no treatment                               | no                              | pigmentation  | 10 months            |                            |

| No. | Age | Sex | Localization of bullous lesions | Size of lesions | Organ involvement |         |       | Biopsy: IgA-deposition | Medical Treatment                           | Re-occurrence of lesions                   | Skin sequelae          | Documented Follow-up | Reference              |
|-----|-----|-----|---------------------------------|-----------------|-------------------|---------|-------|------------------------|---------------------------------------------|--------------------------------------------|------------------------|----------------------|------------------------|
|     |     |     |                                 |                 | Joints            | Abdomen | Renal |                        |                                             |                                            |                        |                      |                        |
| 17  | 8   | m   | hands, feet                     | not reported    | yes               | yes     | no    | yes                    | PS                                          | re-occurrence after 2.5 years <sup>1</sup> | unknown                | 2.5 years            | Maguiness <i>et al</i> |
| 18  | 15  | f   | legs                            | not reported    | no                | no      | no    | no                     | topical corticosteroids                     | no                                         | none                   | not reported         |                        |
| 19  | 8   | m   | trunks, legs                    | not reported    | yes               | yes     | no    | yes                    | topical corticosteroids                     | not reported                               | unknown                | not reported         |                        |
| 20  | 8   | m   | legs                            | not reported    | no                | no      | no    | not performed          | no treatment                                | not reported                               | unknown                | not reported         |                        |
| 21  | 11  | f   | legs                            | not reported    | no                | yes     | no    | yes                    | no treatment                                | not reported                               | unknown                | not reported         |                        |
| 22  | 10  | f   | legs                            | not reported    | no                | yes     | no    | not performed          | MPS                                         | not reported                               | unknown                | not reported         |                        |
| 23  | 6   | m   | arms, legs                      | not reported    | no                | yes     | yes   | yes                    | PS                                          | no                                         | scarring, Pigmentation | 22 months            | den Boer <i>et al</i>  |
| 24  | 10  | m   | legs                            | not reported    | no                | no      | yes   | no                     | PS                                          | no                                         | mild scarring          | 17 months            |                        |
| 25  | 16  | f   | legs                            | not reported    | yes               | yes     | no    | yes                    | PS                                          | re-occurrence after 1 year <sup>1</sup>    | scarring               | 12 months            | Abdulla <i>et al</i>   |
| 26  | 9   | f   | arms, legs                      | 2-30 mm         | yes               | yes     | yes   | not performed          | MPS, PS                                     | no                                         | scarring, pigmentation | 12 months            | Trapani <i>et al</i>   |
| 27  | 11  | m   | ankles, legs                    | not reported    | yes               | no      | no    | not performed          | no treatment                                | no                                         | unknown                | 28 months            |                        |
| 28  | 7   | f   | face, arms, trunks, legs        | not reported    | yes               | no      | yes   | not performed          | MPS, PS, AZA                                | no                                         | unknown                | 5 months             |                        |
| 29  | 3   | f   | ankles, feet                    | not reported    | yes               | yes     | yes   | no                     | PS, started 3 days before onset of bullae   | no                                         | mild scarring          | 6 months             | Park <i>et al</i>      |
| 30  | 9   | f   | ankles, feet                    | not reported    | yes               | no      | yes   | not performed          | PS                                          | no                                         | unknown                | not reported         | Raymond <i>et al</i>   |
| 31  | 8   | f   | arms, legs                      | 15 mm           | no                | yes     | no    | not performed          | PS, started > 3 days before onset of bullae | no                                         | none                   | not reported         | Hömber <i>et al</i>    |
| 32  | 6   | m   | legs, feet                      | 20-30 mm        | yes               | yes     | no    | not performed          | PS                                          | no                                         | none                   | 12 months            | Matsubara <i>et al</i> |
| 33  | 14  | m   | feet                            | not reported    | no                | yes     | yes   | not performed          | PS                                          | no                                         | unknown                | 4 weeks              | Parikh <i>et al</i>    |

| No. | Age | Sex | Localization of bullous lesions | Size of lesions | Organ involvement |         |       | Biopsy: IgA-deposition | Medical Treatment       | Resolution of lesions        | Skin sequelae             | Documented Follow-up | Reference             |
|-----|-----|-----|---------------------------------|-----------------|-------------------|---------|-------|------------------------|-------------------------|------------------------------|---------------------------|----------------------|-----------------------|
|     |     |     |                                 |                 | Joints            | Abdomen | Renal |                        |                         |                              |                           |                      |                       |
| 34  | 4   | f   | ankles, legs                    | not reported    | yes               | yes     | yes   | not reported           | PS                      | no                           | unknown                   | 4 months             | Kocaoglu <i>et al</i> |
| 35  | 9   | f   | trunk, legs                     | 3-50 mm         | no                | yes     | yes   | yes                    | DEX, PS, AZA            | no                           | unknown                   | 5 years              | Mehra <i>et al</i>    |
| 36  | 3   | m   | arms, legs                      | not reported    | no                | no      | no    | not reported           | no treatment            | no                           | unknown                   | 6 months             | Gratin <i>et al</i>   |
| 37  | 14  | f   | trunk, arms, legs               | not reported    | yes               | no      | no    | yes                    | PS, dapsone             | no                           | mild pigmentation         | 6 months             | Chen <i>et al</i>     |
| 38  | 9   | m   | ankles, feet                    | not reported    | yes               | no      | no    | not performed          | topical corticosteroids | no                           | unknown                   | 1 month              | Hopper <i>et al</i>   |
| 39  | 5   | m   | legs, face                      | not reported    | yes               | yes     | no    | yes                    | PS, colchicine          | re-occurrence w/o colchicine | unknown                   | 3 years              | Allali <i>et al</i>   |
| 40  | 14  | f   | legs                            | not reported    | yes               | no      | no    | yes                    | HC, PS, AZA             | no                           | unknown                   | 2 months             | Hasbun <i>et al</i>   |
| 41  | 15  | m   | legs, ankles                    | 2-20 mm         | yes               | yes     | no    | no                     | HC, PS                  | no                           | mild scarring             | 12 months            | Su <i>et al</i>       |
| 42  | 5   | m   | legs, ankles, feet              | 5-40 mm         | yes               | yes     | no    | yes                    | PS                      | no                           | scarring, skin transplant | 11 months            | present report        |

AZA azathioprine, DEX dexamethasone, HC hydrocortisone, MPS methylprednisolone, PS prednisolone

<sup>1</sup> this patient was diagnosed with recessive-dystrophic epidermolysis bullosa

<sup>2</sup> this patient was diagnosed with dominant dystrophic epidermolysis bullosa
